# Supplementary figures and images for: Performance and mechanism of conductive magnetite particle-enhanced excess sludge anaerobic digestion for biogas recovery
Source: Royal Society of Chemistry journal article supplement (doi:10.1039/d1ra06236k), 2021-01-01

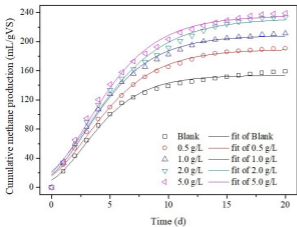

Supplement: d1ra06236k1.pdf [file d1ra06236k1.pdf]
